# Supplementary material
Source: PubMed Central journal article supplement (PMC5541899)
Supplement: NIHMS883145-supplement-1.pdf [file NIHMS883145-supplement-1.pdf]

## **Supplemental Information**

### **Inventory of information:**

- **7 supplemental figures**
- **4 supplemental tables**
- **Supplemental Experimental Procedures**
- **Supplemental References**

NRPE1

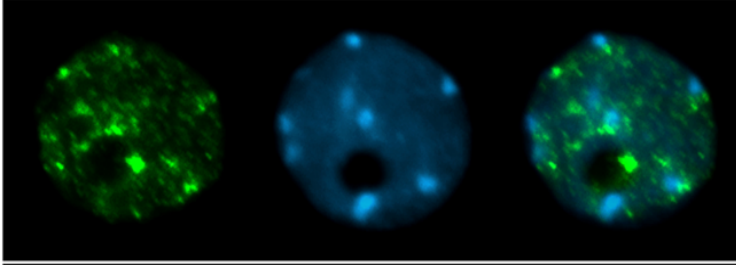

92%

n=209

NRPE1 $\Delta$ <sup>1251-1976</sup>

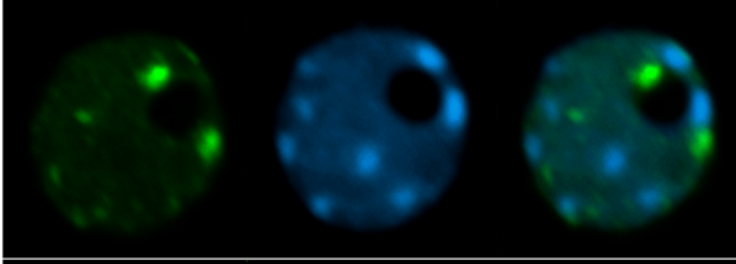

45%

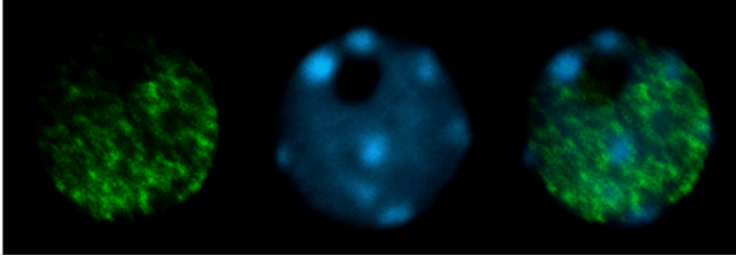

55%

n=309

Col-0

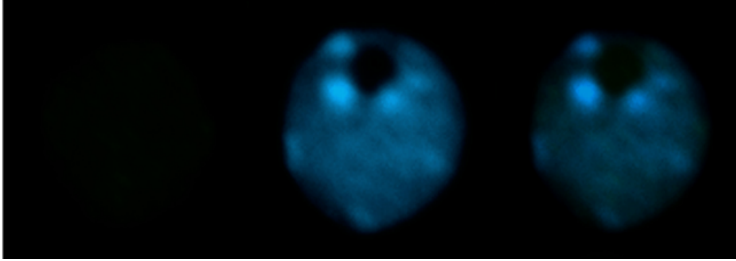

94%

n=146

**Figure S1.** Nuclear immunolocalization of full-length NRPE1 and NRPE1 missing the CTD ( $\Delta 1251-1976$ ). Related to Figure 1. Nuclei were fixed using formaldehyde and incubated with anti-HA antibodies recognizing the HA epitope tag at the C-termini of the recombinant proteins. Nuclei of non-transgenic Col-0 serve as a negative control. Nuclei were counterstained with DAPI. Dark, DAPI-negative regions, appearing as black holes, are nucleoli. Bright Pol V foci frequently observed at the edges of the nucleoli (apparent in the top two rows of images) correspond to Cajal bodies. The number of nucleoli examined, and the frequency of localization patterns that resemble the representative images shown, are provided to the right of the images. Note that Pol V assembled using NRPE1 that is missing the CTD displays a nuclear localization pattern only subtly different from that observed for full-length NRPE1. Whereas full-length NRPE1 is present in a larger number of concentrated foci, CTD-deleted NRPE1 tends to be more diffuse, or present in smaller, punctate foci.

**A. 5S rDNA methylation:**

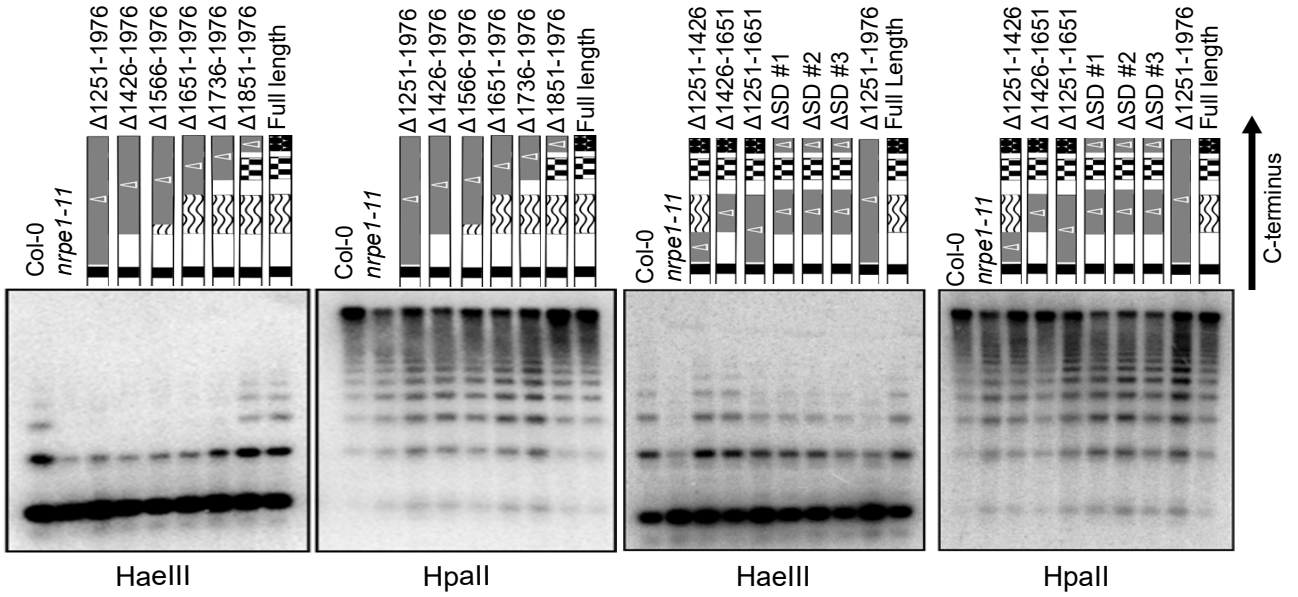

**B. RT-PCR:**

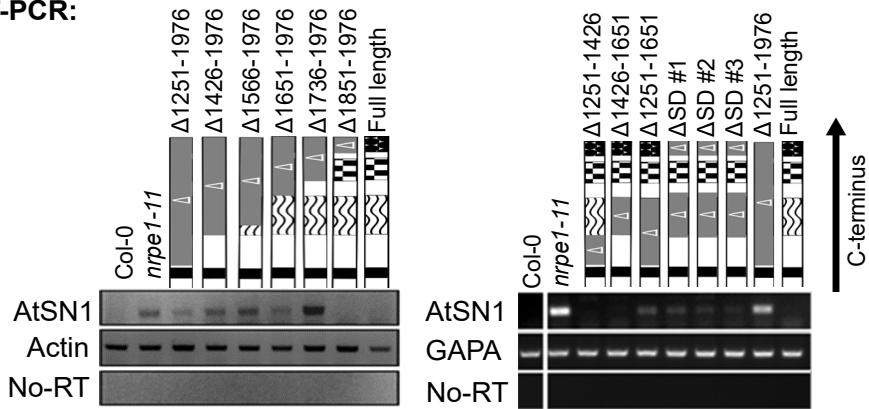

**C. sRNA Blot:**

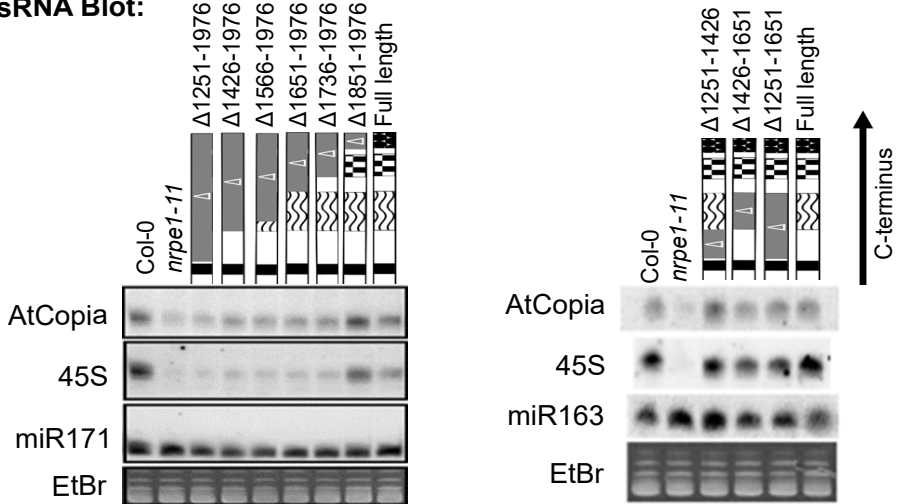

**Figure S2.** Consequences of NRPE1 CTD deletions on 5S rRNA gene silencing, AtSN1 transposon silencing and siRNA abundance. Related to Figure 2.

**A.** Southern blot analysis of 5S rRNA gene repeats after digestion with the methylation sensitive enzymes, *Hae*III or *Hpa*II. Decreased cytosine methylation results in increased digestion, and smaller products. Note the importance of the DeCL domain, and the combinatorial effects of deletions affecting the linker plus 17 aa repeat subdomains or 17aa repeat plus QS subdomains, which have greater effect than deletions of the individual subdomains.

**B.** RT-PCR analysis of *AtSN1* retrotransposon transcripts generated when Pol V-dependent silencing is lost. *Actin* and *GAPA* are Pol II transcribed genes included as positive controls. Note that silencing is lost if the DeCL subdomain is deleted.

**C.** Northern blot analysis of Pol IV and Pol V-dependent 24nt siRNAs corresponding to *AtCopia* transposons or 45S rRNA gene repeats. *miR171* and *miR163* are 21nt micro RNAs unaffected by the RdDM pathway, included as positive controls. Note that siRNA levels are reduced when the DeCL subdomain is deleted.

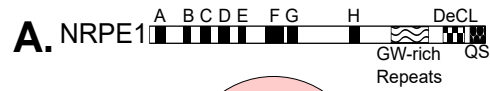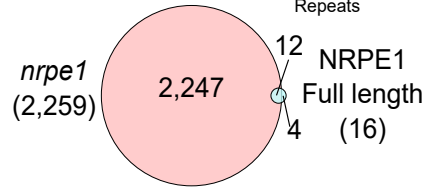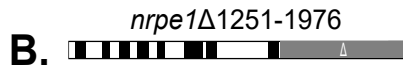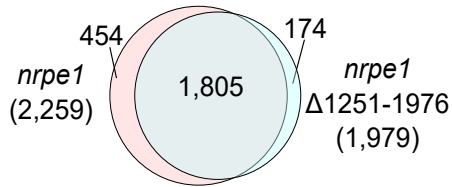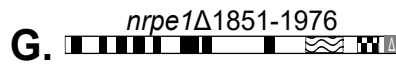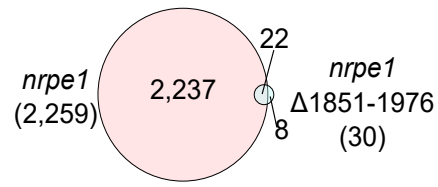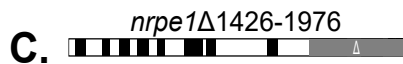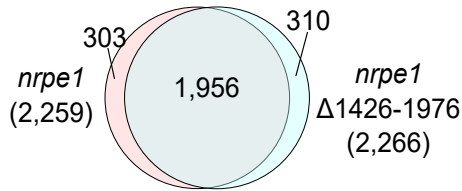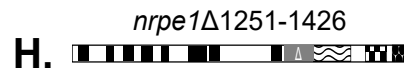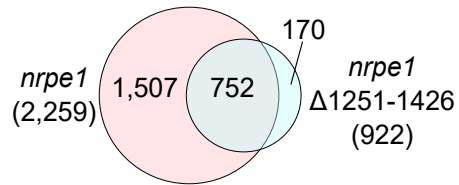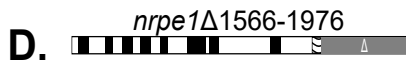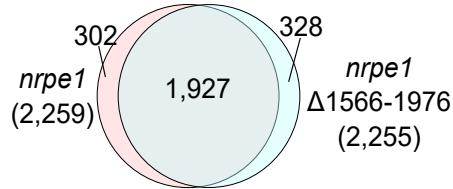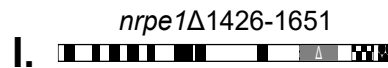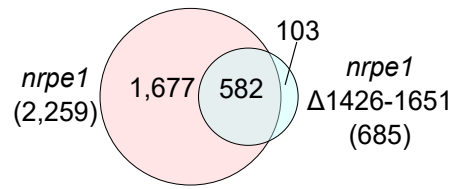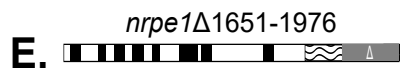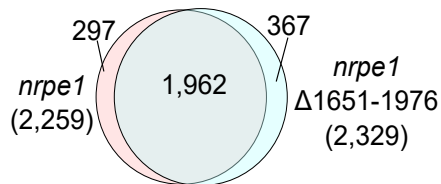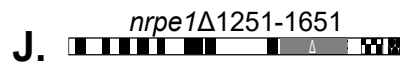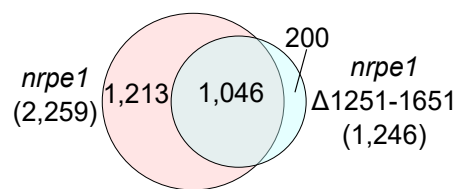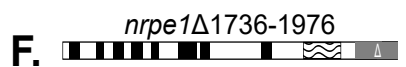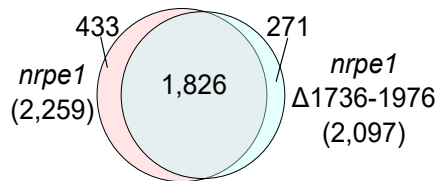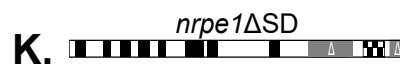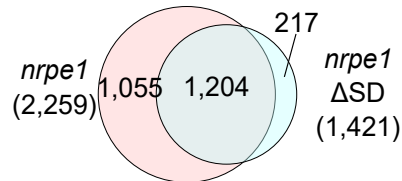

**Figure S3.** Overlap between CHH DMRs that become hypomethylated in the *nrpe1-11* mutant and DMRs that remain hypomethylated (un-rescued) in each CTD deletion line. Related to Figure 2. All DMRs are defined relative to methylation levels in wild-type Col-0 (see Methods for details).

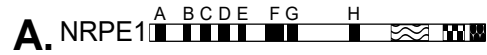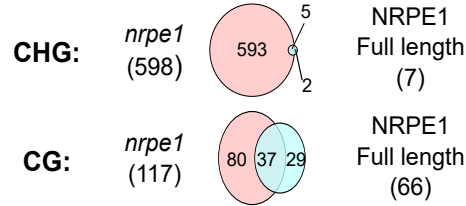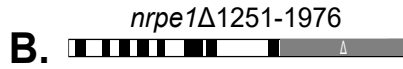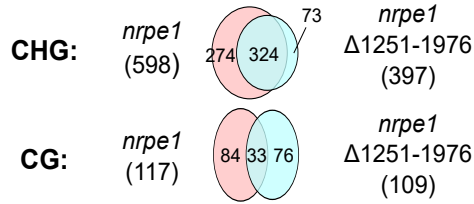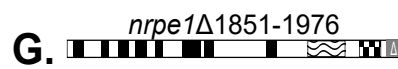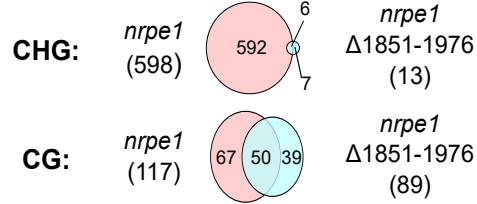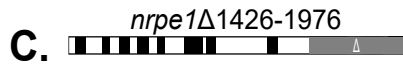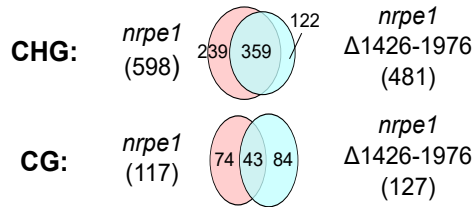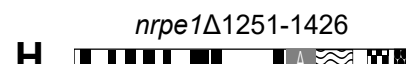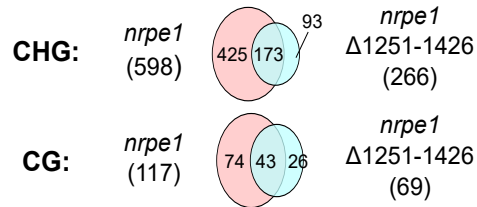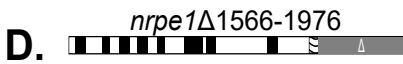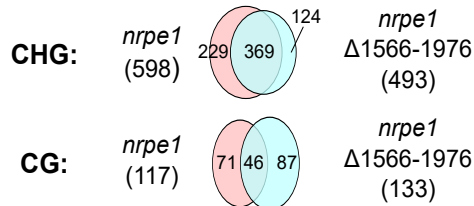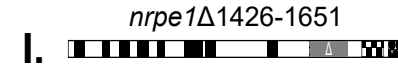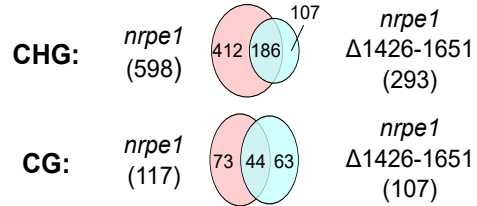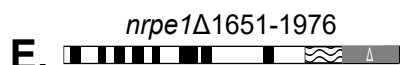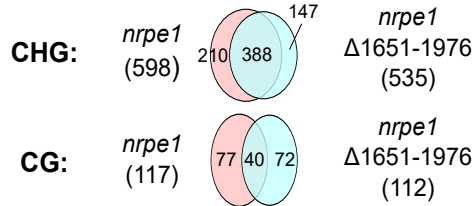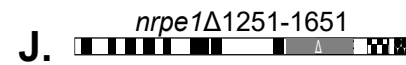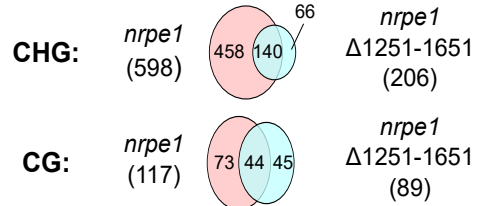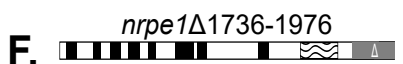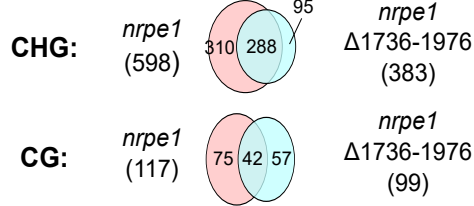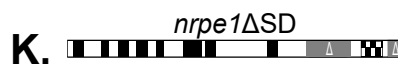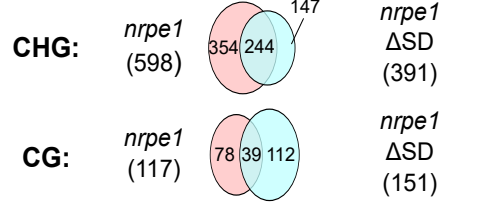



**Figure S4.** Overlap between CG and CHG DMRs that become hypomethylated in the *nrpe1-11* mutant and DMRs that remain hypomethylated (un-rescued) in each CTD deletion line. Related to Figure 2. All DMRs are defined relative to methylation levels in wild-type Col-0 (see Methods for details).

**A.**

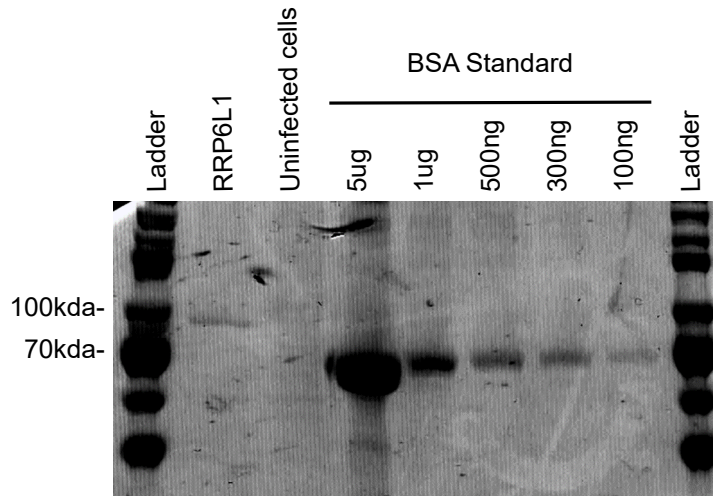

**B. Interaction assay:**

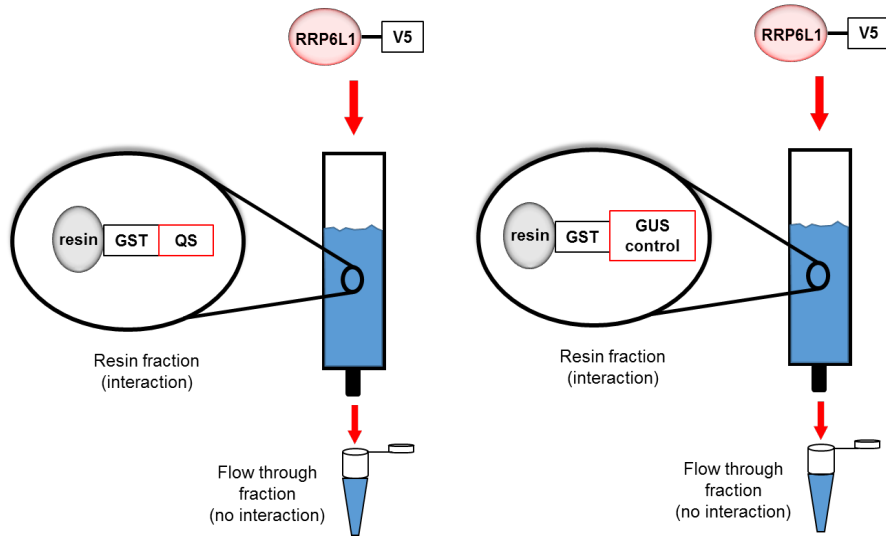

**Immunoblot:**

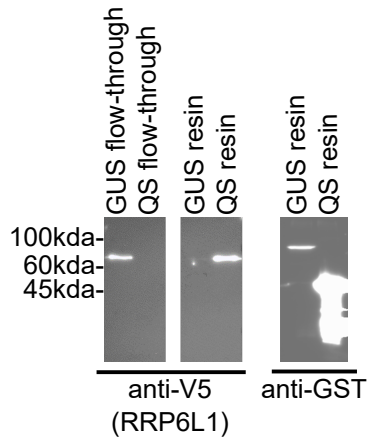

**Figure S5.** RRP6L1 expressed in insect cells physically interacts with the QS subdomain of NRPE1. Related to Figures 4-5.

**A.** Coomassie stained gel showing purified RRP6L1, uninfected cell lysate and a Bovine Serum Albumin (BSA) dilution series. Recombinant RRP6L1 was engineered to have C-terminal His and V5 tags and was expressed in insect cells using a baculovirus vector. The His-tag allowed the protein to be purified using nickel affinity resin.

**B.** *In vitro* assay for RRP6L1 interaction with the QS domain (aa1851-1976) of the Pol V CTD. GST-fused to a QS domain polypeptide or a GUS protein control were expressed in bacterial cells and immobilized on glutathione sepharose resin. The resins were then incubated with RRP6L1, and washed extensively to remove unbound protein. RRP6L1 was retained on the resin with immobilized GST-QS peptide, but not the GST-GUS control resin, as shown by SDS-PAGE and immunoblot analyses of resin and flow-through fractions using anti-V5 (recognizing the epitope tag on RRP6L1) or anti-GST antibodies.

**A. Locus: IGN17**

Bisulfite sequencing:

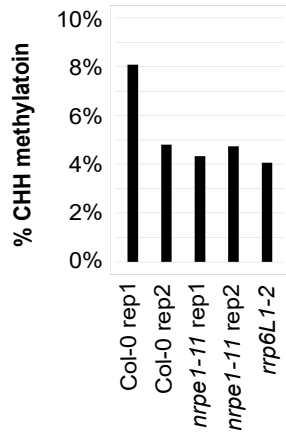

3' RACE

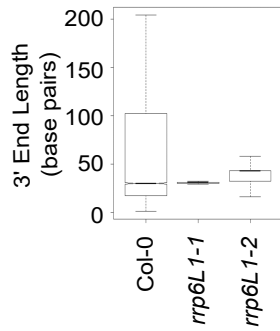

**B. Locus: IGN29**

Bisulfite sequencing:

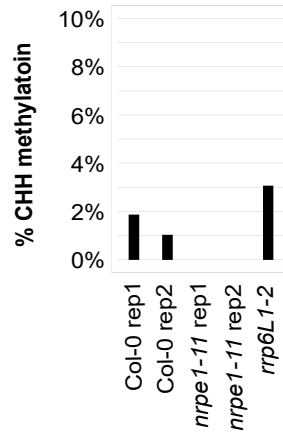

3' RACE

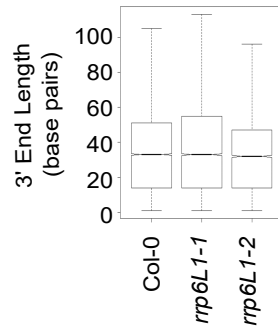

**C. IGN5A genomic locus: Chr. 4: 2323890-2323730**

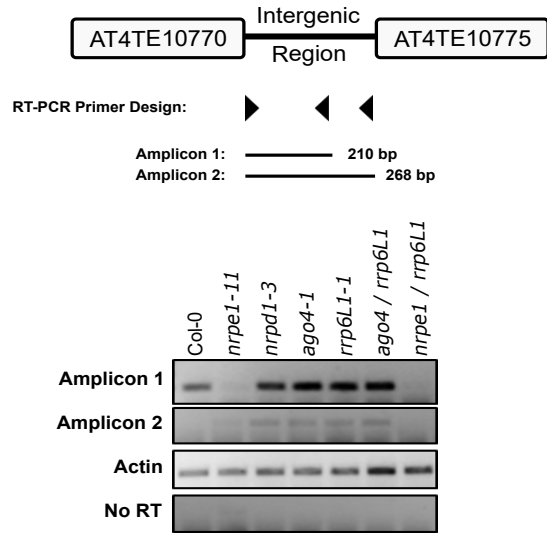

**Figure S6.** Evidence of RRP6L1 trimming of Pol V transcript 3' ends is not detected at loci where methylation is not dependent on RRP6L1. Related to Figure 6 and Table S4. Bisulfite sequencing and 3' RACE results for Pol V dependent transcripts from: **A.** *IGN17* (Chr1: 13585614-13585914) and **B.** *IGN29* (Chr2: 15314700-15315000). Histograms show %CHH methylation measured by whole genome bisulfite sequencing. Box plots show the measured 3' end lengths in basepairs relative to the internal gene specific primer used in the 3' RACE PCR. **C.** RT-PCR of the Pol V-dependent transcript *IGN5*. Strand-specific RT was performed such that Amplicon 2 detects products with extended 3' ends.

**A.**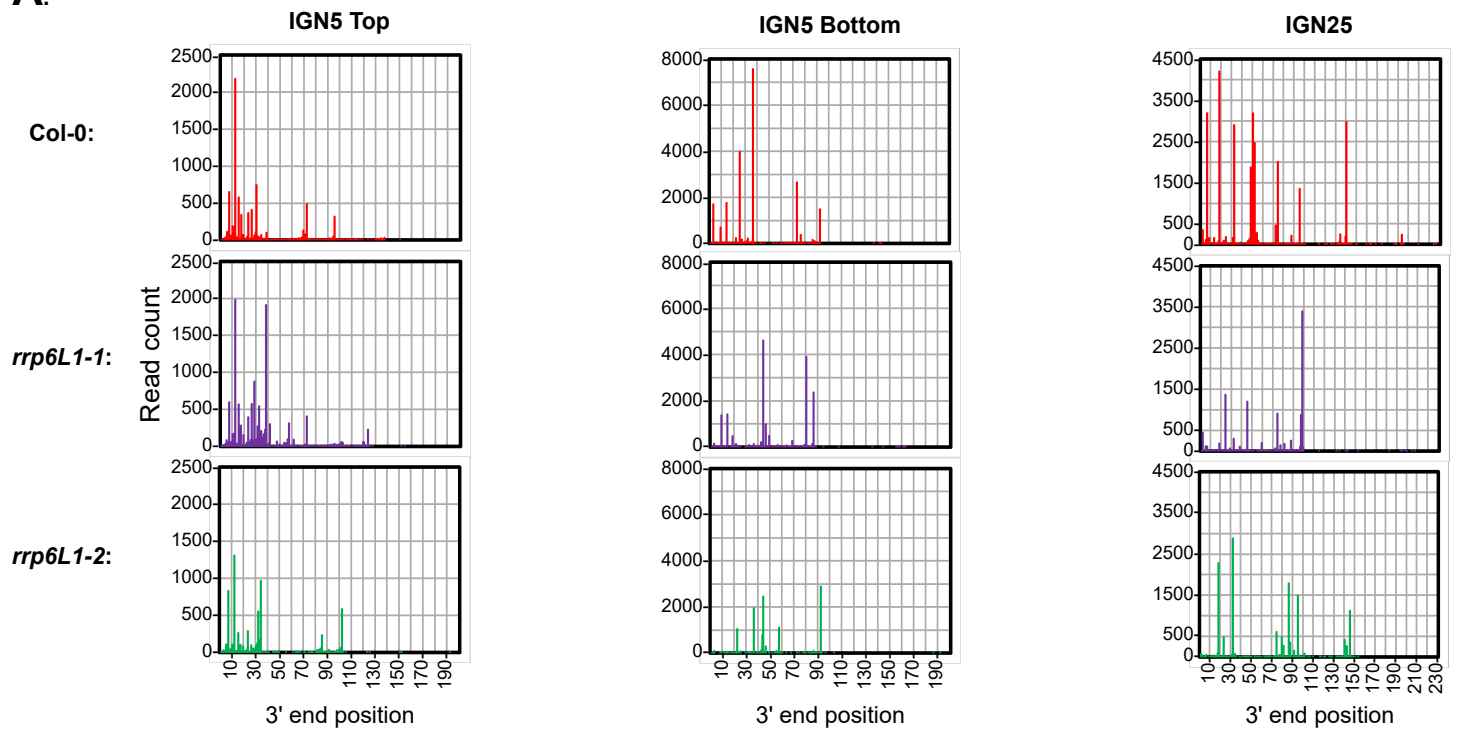**B.**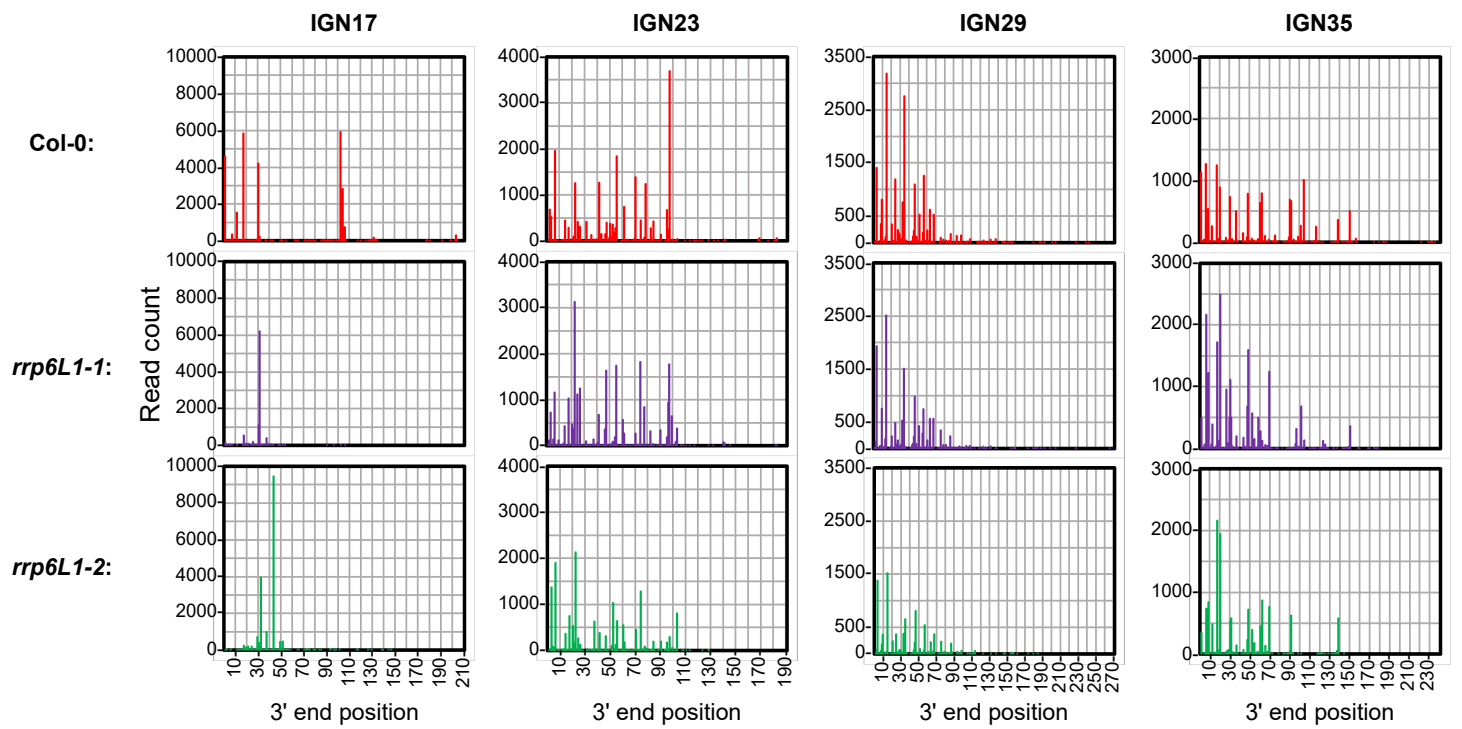

**Figure S7.** Distribution of Pol V transcript 3' ends detected by 3' RACE. Related to Figures 6, S6 and Table S4. Shown are the read counts for each 3' end position (designated in number of nucleotides 3' of the 3' RACE internal gene specific primer) detected in Col-0 and *rrp6L1* mutants at loci that undergo RRP6L1 dependent cytosine methylation (**A**) and loci where methylation is established independent of RRP6L1 (**B**).

**Table S1. Genome wide bisulfite sequencing stats. Related to Figures 2 and 4.**

| Sample                       | Accession  | Source              | Reads      | Uniquely Mapped reads | % Uniquely Mapping | De-duplicated reads | X Coverage | ChrC mapped cytosines | ChrC methylated cytosines | % Conversion |
|------------------------------|------------|---------------------|------------|-----------------------|--------------------|---------------------|------------|-----------------------|---------------------------|--------------|
| Col-0 rep1                   | GSM2451991 | This Study          | 44,460,982 | 28,174,303            | 63.37%             | 18,209,996          | 21.61      | 144,836,404           | 546,268                   | 99.62%       |
| <i>nrpe1-11</i> rep1         | GSM2451993 | This Study          | 40,333,481 | 26,492,991            | 65.68%             | 17,792,319          | 21.11      | 133,795,491           | 473,114                   | 99.65%       |
| NRPE1 full length rep1       | GSM2451995 | This Study          | 38,013,343 | 24,809,228            | 63.57%             | 16,762,607          | 19.89      | 122,987,872           | 455,828                   | 99.63%       |
| <i>nrpe1</i> Δ1251-1651 rep1 | GSM2452013 | This Study          | 39,404,933 | 25,049,535            | 65.51%             | 16,831,751          | 19.97      | 134,435,407           | 559,419                   | 99.58%       |
| <i>nrpe1</i> Δ1736-1976 rep1 | GSM2452005 | This Study          | 42,908,764 | 28,108,382            | 65.51%             | 18,273,998          | 21.68      | 155,434,322           | 622,802                   | 99.60%       |
| <i>nrpe1</i> ΔSD rep1        | GSM2452015 | This Study          | 50,595,778 | 32,648,309            | 64.53%             | 20,377,533          | 24.18      | 145,903,463           | 528,060                   | 99.64%       |
| <i>nrpe1</i> Δ1251-1976 rep1 | GSM2451997 | This Study          | 53,439,616 | 34,979,265            | 65.46%             | 22,291,361          | 26.45      | 133,919,257           | 566,206                   | 99.58%       |
| <i>nrpe1</i> Δ1426-1976 rep1 | GSM2451999 | This Study          | 51,368,333 | 33,002,962            | 64.25%             | 21,801,303          | 25.87      | 104,634,789           | 424,011                   | 99.59%       |
| <i>nrpe1</i> Δ1566-1976 rep1 | GSM2452001 | This Study          | 56,843,693 | 36,706,316            | 64.57%             | 23,284,990          | 27.63      | 127,791,392           | 519,814                   | 99.59%       |
| <i>nrpe1</i> Δ1651-1976 rep1 | GSM2452003 | This Study          | 53,562,928 | 35,115,705            | 65.56%             | 22,913,656          | 27.19      | 135,499,575           | 522,918                   | 99.61%       |
| <i>nrpe1</i> Δ1851-1976 rep1 | GSM2452007 | This Study          | 55,574,617 | 35,954,311            | 64.70%             | 23,483,894          | 27.87      | 118,852,143           | 475,319                   | 99.60%       |
| <i>nrpe1</i> Δ1251-1426 rep1 | GSM2452009 | This Study          | 53,129,033 | 34,028,642            | 64.05%             | 21,626,413          | 25.66      | 153,671,866           | 591,426                   | 99.62%       |
| <i>nrpe1</i> Δ1426-1651 rep1 | GSM2452011 | This Study          | 52,653,935 | 32,656,149            | 62.02%             | 20,765,787          | 24.64      | 158,511,978           | 657,066                   | 99.59%       |
| Col-0 rep2                   | GSM2451992 | This Study          | 38,733,453 | 24,915,519            | 64.33%             | 17,430,896          | 20.68      | 107,648,039           | 507,038                   | 99.53%       |
| <i>nrpe1-11</i> rep2         | GSM2451994 | This Study          | 47,986,860 | 32,613,597            | 67.96%             | 20,687,953          | 24.55      | 167,076,843           | 666,888                   | 99.60%       |
| NRPE1 full length rep2       | GSM2451996 | This Study          | 39,119,926 | 25,903,331            | 66.22%             | 17,207,809          | 20.42      | 117,907,853           | 451,212                   | 99.62%       |
| <i>nrpe1</i> Δ1251-1651 rep2 | GSM2452014 | This Study          | 40,469,664 | 27,130,551            | 67.04%             | 17,310,659          | 20.54      | 147,108,843           | 553,722                   | 99.62%       |
| <i>nrpe1</i> Δ1736-1976 rep2 | GSM2452006 | This Study          | 42,943,982 | 28,722,593            | 66.88%             | 18,348,619          | 21.77      | 158,837,642           | 639,988                   | 99.60%       |
| <i>nrpe1</i> ΔSD rep2        | GSM2452016 | This Study          | 53,753,337 | 35,075,045            | 65.25%             | 20,982,367          | 24.90      | 181,096,087           | 612,749                   | 99.66%       |
| <i>nrpe1</i> Δ1251-1976 rep2 | GSM2451998 | This Study          | 37,542,631 | 24,504,676            | 65.27%             | 14,985,591          | 17.78      | 96,626,985            | 409,069                   | 99.58%       |
| <i>nrpe1</i> Δ1426-1976 rep2 | GSM2452000 | This Study          | 44,592,352 | 28,924,727            | 64.86%             | 18,355,489          | 21.78      | 108,448,450           | 440,344                   | 99.59%       |
| <i>nrpe1</i> Δ1566-1976 rep2 | GSM2452002 | This Study          | 47,837,147 | 31,523,368            | 65.90%             | 19,758,216          | 23.45      | 105,286,294           | 439,365                   | 99.58%       |
| <i>nrpe1</i> Δ1651-1976 rep2 | GSM2452004 | This Study          | 40,852,904 | 27,256,676            | 66.72%             | 19,002,414          | 22.55      | 84,571,586            | 328,210                   | 99.61%       |
| <i>nrpe1</i> Δ1851-1976 rep2 | GSM2452008 | This Study          | 51,011,863 | 34,050,659            | 66.75%             | 21,615,480          | 25.65      | 125,382,330           | 482,896                   | 99.61%       |
| <i>nrpe1</i> Δ1251-1426 rep2 | GSM2452010 | This Study          | 41,468,051 | 28,087,846            | 67.73%             | 17,838,446          | 21.17      | 136,594,443           | 642,013                   | 99.53%       |
| <i>nrpe1</i> Δ1426-1651 rep2 | GSM2452012 | This Study          | 46,546,645 | 30,612,248            | 65.77%             | 18,737,480          | 22.23      | 164,427,854           | 609,330                   | 99.63%       |
| <i>ago4</i>                  | SRR534197  | Stroud et. al 2013  | 275864062  | 141822231             | 51.41%             | 72,649,618          | 30.35      | 2,132,733             | 32,465                    | 98.48%       |
| <i>ago6</i>                  | SRR534199  | Stroud et. al 2013  | 264475851  | 155448950             | 58.78%             | 79,669,287          | 33.29      | 2,109,298             | 33,817                    | 98.40%       |
| <i>idn2/idn1/idn2</i>        | SRR534236  | Stroud et. al 2013  | 297740753  | 191836596             | 64.43%             | 98,476,031          | 41.15      | 2,159,170             | 9,851                     | 99.54%       |
| <i>spt5L/ktf1</i>            | SRR534238  | Stroud et. al 2013  | 228175457  | 135524716             | 59.39%             | 71,571,920          | 29.90      | 2,129,739             | 20,346                    | 99.04%       |
| <i>rrp6L1</i>                | SRR960246  | Zhang et. al 2014   | 22546460   | 18,235,132            | 80.88%             | 17,553,435          | 26.40      | 75,322,021            | 271,250                   | 99.64%       |
| <i>dms3</i>                  | SRR534216  | Stroud et. al 2013  | 121938777  | 59,497,931            | 48.88%             | 38,079,894          | 15.91      | 1,975,813             | 12,519                    | 99.37%       |
| <i>drd1</i>                  | SRR534221  | Stroud et. al 2013  | 276695439  | 164579432             | 59.48%             | 78,002,308          | 32.59      | 2,148,153             | 24,427                    | 98.86%       |
| <i>suvh2/suvh9</i>           | SRR1023830 | Johnson et. al 2014 | 120048009  | 73,916,597            | 61.57%             | 44,319,269          | 18.52      | 2,130,682             | 27,182                    | 98.72%       |



**Table S2.** Differentially methylated regions. Related to Figures 2, 3, and 4.

**Table S3.** sRNA sequencing data for DMRs. Related to Figure 3F.

**Table S4. Read counts for 3' RACE deep sequencing. Related to Figure 6 and S5. \*Reads also mapped to a highly similar TE gene, AT3G43686, suggesting a spurious amplification of a derepressed TE in this line. This sequence was filtered from all samples before further analyses**

|                 | <b>IGN5 top</b> | <b>IGN5 btm</b> | <b>IGN23</b> | <b>IGN25</b> | <b>IGN35</b> | <b>IGN17</b> | <b>IGN29</b> |
|-----------------|-----------------|-----------------|--------------|--------------|--------------|--------------|--------------|
| Col-0           | 8,539           | 22,079          | 21,930       | 28,398       | 14,377       | 27,611       | 18,555       |
| <i>nrpe1-11</i> | 0               | 4               | 248,926*     | 2            | 3            | 2            | 3            |
| <i>rrp6L1-1</i> | 12,888          | 17,850          | 24,308       | 10,636       | 20,028       | 9,307        | 14,880       |
| <i>rrp6L1-2</i> | 6,999           | 11,627          | 15,845       | 12,843       | 13,641       | 18,209       | 9,140        |

## Supplemental Experimental Procedures

### *Nuclear immunolocalization*

For immunolocalization experiments, nuclei from 4-week old plants were fixed in 4% formaldehyde and incubated overnight at 4°C with antibodies recognizing the C-terminal HA epitope of NRPE1 transgene products, as described in (Pontes et al., 2006). Chromatin was counterstained with DAPI.

### *Southern blot methylation assays*

For the Southern blot analyses described in Figure S2, 250 ng DNA was digested with *HpaII* or *HaeIII* (NEB) and subject to agarose gel electrophoresis and transfer to uncharged nylon membranes. Membranes were probed with a 5S rDNA gene probe generated by random priming of a full length 5S gene PCR product amplified from clone pTC4.2 (Campbell et al., 1992).

### *RT-PCR*

The RT-PCR shown in Figure S2B was conducted using ~1 µg RNA. RNA was treated with RQ1 DNase (Promega) and used to generate random-primed cDNA using degenerate dN6 primers (NEB) and Superscript III Reverse Transcriptase (Invitrogen) according to the manufacturer's instructions. PCR was conducted with GoTaq green (Promega) using primers listed below. PCR products were analyzed by agarose gel electrophoresis.

### *sRNA blot*

RNA was isolated from 350 mg inflorescence tissue using a mirVana miRNA isolation kit (Ambion). 9.5 µg RNA was resolved by denaturing polyacrylamide gel electrophoresis on a 20% (w/v) gel. Gels were electroblotted (20 mA/cm<sup>2</sup> for 2 hours) to Magnacharge nylon membranes (0.22 µm; Osmonics) using a semidry transfer apparatus. Riboprobes were generated using the mirVana probe construction kit (Ambion) using oligonucleotides specific for a given small RNA and labeling by T7 polymerase transcription in the presence of α-<sup>32</sup>P CTP. DNA oligonucleotides are listed in below. Blots were hybridized in 50% formamide, 0.25 M Na<sub>2</sub>HPO<sub>4</sub> (pH 7.2), 0.25 M NaCl, 7% SDS at 42°C (14–16 hours) followed by two 15 minute washes at 37°C in 2× SSC, two 15 minute washes at 37°C in 2× SSC, 0.1% SDS, and a 10 minute wash in 0.5× SSC, 1% SDS.

### *Heterologous protein expression*

*Arabidopsis thaliana* RRP6L1 cDNA, minus the stop codon, was amplified from total RNA using primers listed below. cDNA clones were recombined into the Baculovirus expression system and expressed in Sf9 cells using the Baculo-Direct kit according to the manufacturer's protocol (Invitrogen). Transformed viruses expressed RRP6L1 modified with a C-terminal 6X His and V5 tag. Protein was purified from P3 virus infected 75 ml Sf9 cultures after incubation for 72 hours. Cells were pelleted by centrifugation at 150 x g for 2 minutes and washed twice with 1X PBS. After the second wash, cells were suspended in binding buffer (0.5 M NaCl, 20 mM Tris-HCl pH 8, 5 mM imidazole) and lysed via sonication with a Biorupter UCD-200 sonicator at 4°C with the settings at Low for 1 minute, and intervals of 10 seconds on, 10 seconds off. Lysate was cleared by centrifugation at 14,000 x g for 20 minutes. Protein was purified from cell extract using Novagen HisBind slurry according to the manufacturer's protocol. For negative controls, uninfected cells were subject to the same protocol.

### *In vitro transcription assays*

Polymerases were immunoprecipitated from 4 g frozen leaf tissue as described previously, except that 150 mM Na<sub>2</sub>SO<sub>4</sub> and 5mM MgSO<sub>4</sub> were used in extraction buffer in place of NaCl and MgCl<sub>2</sub>, 25 µl HA resin was used for the IP, and NP-40 was not added to the wash buffer. Resin-associated polymerases were washed once with CB100 buffer (100 mM potassium acetate, 25 mM HEPES, pH 7.9, 20% glycerol, 0.1 mM EDTA, 0.5 mM DTT, 1 mM PMSF), resuspended in 50 µL CB100 buffer and supplemented with 50 µL 2x transcription reaction buffer (120 mM ammonium sulfate, 40 mM HEPES, pH 7.6, 20 mM magnesium sulfate, 20 µM zinc sulfate, 20% glycerol, 0.16 U/µL RNaseOUT, 20 mM DTT, 2 mM ATP, 2 mM UTP, 2 mM GTP, 0.08 mM CTP, 0.2 mCi/mL alpha <sup>32</sup>P-CTP

and 4 pmols of template). Transcription reactions were incubated for 60 minutes at room temperature on a rotating mixer, and stopped by addition of 50 mM EDTA and heating at 75 °C for five minutes. Reaction products were enriched using PERFORMA spin columns (EdgeBio) as per manufacturer's protocol and precipitated using 1/10 volume of 3M sodium acetate, pH 5.2, 20 µg glycogen and 2 volumes isopropanol at -20°C overnight. Precipitated RNA was resuspended in 5 µL 2X RNA loading buffer (NEB), incubated at 70°C for 5 minutes and loaded on to 15% denaturing polyacrylamide gels. Gels were transferred to Whatman 3M filter paper, dried under vacuum for 2 hours at 80 °C, and subjected to phosphorimaging.

Templates for *in vitro* transcription were generated by using equimolar amounts (10 mM each) of DNA template and the RNA primer were mixed in the annealing buffer containing 20 mM HEPES-KOH (pH 7.6) and 100 mM potassium acetate. The mixture was boiled in a water bath and slowly cooled to room temperature. Template sequences are listed below.

#### *In vitro interaction assays*

To test for interaction of insect cell expressed RRP6L1 and the QS subdomain of the NRPE1 CTD, the region encoding amino acids 1851-1976 of the NRPE1 cDNA was amplified and cloned into pDEST15 (Invitrogen) (Primers listed below). The *β-Glucuronidase* (GUS) reporter gene, also expressed in pDEST15, was used as a negative control. Vectors were expressed *E. coli* BL21-AI One-Shot chemically competent cells grown in LB broth supplemented with 50µg/ml Carbenicillin. For protein expression, 2.5 ml overnight culture was added to 50 ml LB broth (50 µg/ml Carbenicillin), which was incubated at 37°C at 225 rpm until an OD600 was reached (~45 minutes). Expression was induced by the addition of L-arabinose to a concentration of 0.2% and cultures were incubated for a further 3 hours. Cells were then pelleted by centrifugation at 10,000 x g for 10 minutes. Pellets were suspended in 10 ml cold binding buffer (140 mM NaCl, 2.7 mM KCl, 10 mM K<sub>2</sub>HPO<sub>4</sub>, 1.8 mM KH<sub>2</sub>PO<sub>4</sub>, pH 7.4) and lysed via sonication with a Biorupter UDC 200 for 10 minutes on High, 30 seconds on, 30 seconds off. Supernatant was cleared twice by centrifugation for 10 minutes at 10,000 x g and then added to a column containing 300 µl Glutathione Sepharose 4B slurry (Amersham) that had previously been equilibrated with 2 washes of 5 ml binding buffer. Supernatant was incubated with glutathione slurry for 2 hours with end over end rotation at 4°C. Sepharose was washed 2X with 10 ml binding buffer, followed by the addition of 450 ng insect cell expressed RRP6L1 suspended in 10 ml binding buffer. Columns were incubated overnight with end over end rotation at 4°C. Sepharose was then washed 3 times with 10 ml binding buffer. Sepharose or flow-through fractions were suspended in SDS page buffer and western blots were performed as described in the section, *Immunoprecipitation and western blot analysis*, using commercially available anti-GST or anti-V5 antibodies.

#### *Bisulfite sequencing analyses*

Base calling, adapter trimming, and read size selection ( $\geq 35$ bp) was performed using bcl2fastq v2.16.0.10. Reads were further quality processed to remove end methylation bias and low quality reads using Cutadapt version 1.9.1 (Martin, 2011) with the following commands:

```
cutadapt -U 7 -u 2 -q 25
```

Cleaned reads were mapped to the *Arabidopsis thaliana* TAIR10 genome, followed by the removal of PCR duplicates, and extraction of methylation information for cytosines with a minimum of 5 read coverage using Bismark version 0.16.1 default settings (Krueger and Andrews, 2011). The bisulfite conversion rate was calculated based on the number of methylated cytosines divided by total mapped cytosines (converted and un-converted) to the chloroplast genome.

Differently methylated regions (DMRs) were defined using information for cytosines in the CG, CHG, or CHH context for two replicates of each genotype relative to Col-0 using the R package methylKit version 0.9.5 (Akalin et al., 2012). Default methylKit commands were used with the following parameters: The genome was split into 300 base pair sliding windows with a step size of 200 base pairs and a minimum coverage requirement for each window of 10 informative cytosines with at least 5 read coverage each. Significant CHH and CHG hypo-DMRs were defined as those regions with a minimum 25% decrease in methylation relative to Col-0 and a q-value of less than or equal to 0.01. For CG methylation a minimum 40% decrease cutoff relative to Col-0 was used. To quantify the number of DMRs in each line, overlapping DMRs were merged into a single region. To quantify percent

methylation across regions of interest, the methylKit regionCounts function was utilized with the genomic coordinates of interest input as a bed file. In box plots, outliers 1.5 times the interquartile range beyond the upper or lower quartile were omitted. Box plots were generated using the boxplot command in R and heatmaps and clustering analyses were generated using the heatmap2 R package with the default clustering method. Differentially methylated regions defined for each genotype are available in Table S2. Accession numbers for previously published bisulfite sequencing data analyzed are in Table S1.

### *sRNA sequencing analyses*

Raw reads were adapter and quality trimmed and size selected using Cutadapt version 1.9.1 using the following commands:

```
cutadapt -a TGG AATTCTCGGGTGCCAAG -q 20 -m 15 -M60
```

Reads were first filtered of all structural RNAs (tRNAs, rRNAs, snRNAs, and snoRNAs) by mapping to a genome consisting of sequences corresponding to all genomic coordinates identified as structural RNAs on TAIR ([www.arabidopsis.org](http://www.arabidopsis.org)) using bowtie2 default commands. All unmapped reads were saved for further analysis.

Filtered and cleaned reads were mapped to the *Arabidopsis* TAIR10 genome using ShortStack version 3.4 default settings (Johnson et al., 2016). sRNA counts for regions of interest were extracted from bam files using the ShortStack --locifile file function. Counts were normalized as reads per million based on total mapped reads. Accession numbers for previously published sRNA data for Col-0 and *nripd1-3* are SRR2075819 and SRR2505369, respectively.

### *3'RACE amplicon sequencing*

RNA was extracted from ~2.5 week old above ground tissues. Since Pol V transcripts lack a poly-A tail (Wendte and Pikaard, 2017; Wierzbicki et al., 2008), a 3' poly-A tail was added to 10 µg RNA prior to reverse transcription using commercially available Poly-A polymerase according to the manufacturer's protocol (NEB). Poly-A tailed RNA was cleaned using the Zymogen RNA clean and concentrate kit. RNA was reverse transcribed using SuperScript III (Invitrogen) with an oligo-d(T) primer that added nested PCR primer binding sequences. Primary PCR was performed on 1 µl cDNA using Platinum Taq (Invitrogen) according to the manufacturer's protocol with 3' RACE Primer 1 and the appropriate gene specific primer. Nested PCR was also performed with Platinum Taq on 0.6 µl primary PCR product using 3' RACE Primer 2 and the appropriate internal gene specific primer. PCR conditions for both PCR reactions were: 94°C 2 minutes, 35 cycles of (94°C 30 seconds, 60°C 30 seconds, 72°C 30 seconds). PCR product sizes were verified to be 500 basepairs or less on ethidium bromide-stained agarose gels, pooled, and cleaned using a Qiagen PCR clean-up kit according to the manufacturer's protocol. Primer sequences are listed below

Pooled and cleaned PCR products for each genotype (up to 1.2 µg) were prepared for Illumina sequencing with NEBnext end repair enzyme and Klenow fragment (3'-5' exo -) from NEB according to the manufacturer's protocols. After each enzyme treatment, products were cleaned with the Zymogen Clean and Concentrator-5 kit. Adapters (NextFlex PCR free DNA barcodes from BIOO Scientific) were ligated to end repaired, A-tailed PCR products using T4 DNA ligase (NEB) according to the manufacturer's protocol at 16°C for 2 hours. Libraries were cleaned using 1 volume AMPure XP beads (Beckman Coulter) according to the manufacturer's instructions and quality checked and quantified with an Agilent TapeStation. 250 basepair single end reads were generated on an Illumina MiSeq by the Indiana University Center for Genomics and Bioinformatics (IU CGB).

Base calling and adapter trimming was performed using bcl2fastq v2.16.0.10 by the IU CGB. Reads were further processed with the following steps to ensure that only reads containing true 3' end sequences were included in further analyses. Reads were first selected for and trimmed of the 3' RACE Primer 2 sequence using Cutadapt version 1.9.1 with the following commands:

```
cutadapt -g ctactactagccacgcgtcgactagtagtac -q 20,20 -m 15 --discard-untrimmed
```

Reads were then selected for and trimmed of the artificially added poly-A tail with the following:

```
cutadapt -g "t(210)" -m 15 --discard-untrimmed
```

Trimmed reads were then mapped to sequences extracted from the *A. thaliana* TAIR10 genome corresponding to the PCR target regions (consisting of genomic sequences from the following coordinates: Chr4: 2318164-2323164 (*IGN5* top strand); Chr4: 2323282-2328282 (*IGN5* bottom strand); Chr4: 2577970-2582970 (*IGN23*); Chr4: 5459147-5464147 (*IGN25*); Chr2: 15314824-15319824 (*IGN29*); Chr4: 6549057-6554057 (*IGN35*); Chr1: 13585635-13590635 (*IGN17*) using bowtie2 in local alignment mode (Langmead and Salzberg, 2012). SAM output files were converted to bam files, sorted, indexed, and split into individual bam files for each PCR target region using samtools (Li et al., 2009). Bam files were converted to bed files using bedtools (Quinlan and Hall, 2010). Bed files were further filtered for high quality mapping scores (MapQ >= 40) and reads that mapped to the appropriate strand, selected for by the GSP. Read coordinates in the bed files were used to calculate the 3' end lengths relative to the coordinate of the 3' end of the internal gene-specific primer. Boxplots of relative 3' end lengths reported in Figures 6 and S6 were generated using the R boxplot function.

### Oligonucleotides used in this study

#### NRPE1 construct cloning

|                       |                  |                                                                   |
|-----------------------|------------------|-------------------------------------------------------------------|
| nrpe1 Δ1251-1976      | nrpe1-F          | CAC CGC GTA CTA CAA ACG GAA ACG GTC A                             |
|                       | nrpe1-d1251-R    | GAT AAA GAA GAA ACA GAT GTG TAC AGC TTC CTT                       |
| nrpe1 Δ1426-1976      | nrpe1-F          | CAC CGC GTA CTA CAA ACG GAA ACG GTC A                             |
|                       | nrpe1-d1426-R    | CCA CGA TTT GTC TGA AAC AGA TTT GTG TCC                           |
| nrpe1 Δ1566-1976      | nrpe1-F          | CAC CGC GTA CTA CAA ACG GAA ACG GTC A                             |
|                       | nrpe1-d1566-R    | CCC CAT ACC CCA ACC AGC AGG                                       |
| nrpe1 Δ1651-1976      | nrpe1-F          | CAC CGC GTA CTA CAA ACG GAA ACG GTC A                             |
|                       | nrpe1-d1651-R    | GTC TTC TGC AGT GGG ACT TGG C                                     |
| nrpe1 Δ1736-1976      | nrpe1-F          | CAC CGC GTA CTA CAA ACG GAA ACG GTC A                             |
|                       | nrpe1-d1736-R    | CTC AGA GGT GAA TGA GTC CAA GCG                                   |
| nrpe1 Δ1851-1976      | nrpe1-F          | CAC CGC GTA CTA CAA ACG GAA ACG GTC A                             |
|                       | nrpe1-d1851-R    | GAA TTC ATT GAC AAG TAC TTT ACG AAA CCT                           |
| nrpe1 Δ1251-1426      | d1251-1426 mut-F | GTG TAC AGC TTC CTT GAC AAA AAG AAC TGG GGA ACT GAA TCA GC        |
|                       | d1251-1426-F     | GAC AAA AAG AAC TGG GGA ACT GAA TCA GC                            |
|                       | d1251-1426 mut-R | AAG GAA GCT GTA CAC ATC TGT TTC TTC TTT ATC ATC TAG ACC AGT CTG C |
|                       | d1251-1426-R     | ATC TGT TTC TTC TTT ATC ATC TAG ACC AGT CTG C                     |
| nrpe1 Δ1251-1651      | d1251-1651 mut-F | GTG TAC AGC TTC CTT AAG GAT ACC AAT GAG GAT GAT AGA AAT CCG TG    |
|                       | d1251-1651-F     | AAG GAT ACC AAT GAG GAT GAT AGA AAT CCG TG                        |
|                       | d1251-1651 mut-R | AAG GAA GCT GTA CAC ATC TGT TTC TTC TTT ATC ATC TAG ACC AGT CTG C |
|                       | d1251-1651-R     | ATC TGT TTC TTC TTT ATC ATC TAG ACC AGT CTG C                     |
| nrpe1 Δ1426-1651      | d1426-1651-F     | GTT TCA GAC AAA TCG TGG AAG GAT ACC AAT GAG                       |
|                       | d1426-1651-R     | CTC ATT GGT ATC CTT CCA CGA TTT GTC TGA AAC                       |
| NRPE1 1426-1851 (Y2H) | NRPE1 1426-F     | CAC CAT GTG GGA CAA AAA GAA CTG GGG AAC TG                        |
|                       | NRPE1 1851-R     | TCA AGG TTT CGT AAA GTA CTT GTC AAT GAA TTC                       |
|                       |                  |                                                                   |

|                                |              |                                            |
|--------------------------------|--------------|--------------------------------------------|
| NRPE1 1426-1651 (Y2H)          | NRPE1 1426-F | CAC CAT GTG GGA CAA AAA GAA CTG GGG AAC TG |
|                                | NRPE1 1651-R | TCA GTC TTC TGC AGT GGG ACT TGG C          |
| NRPE1 1851-1976 (Y2H)          | NRPE1 1851-F | CAC CAT GCC TCG GCC TAG CGG AAA CAG        |
|                                | NRPE1 1976-R | TTA TGT CTG CGT CTG GGA CGG                |
| <b>Chop PCR Figure 2A, 6</b>   |              |                                            |
| IGN5B                          | Forward      | CGCAGCGGAATTGACATCCTATC                    |
|                                | Reverse      | TCGGAAAGAGACTCTCCGCTAGAAA                  |
| IGN5A                          | Forward      | CCCAGAAAGAGTAGAACAAATGCTAAAA               |
|                                | Reverse      | CTGAGGTATTCATAGCCCCTGATCC                  |
| IGN23                          | Forward      | ACTGAAAATTGTAAACAAAGAAACGGCACTACA          |
|                                | Reverse      | GATCGGTCCATAAACTTGTGGGTTT                  |
| IGN25                          | Forward      | TCAAACCAAACCCCGAACTT                       |
|                                | Reverse      | ATTCGTGTGGGCTTGGCCTCTT                     |
| IGN26                          | Forward      | CTCTTTCAGTGCACAGCCTCAT                     |
|                                | Reverse      | CGGCCAGGAAACCCTAACTTCC                     |
| IGN35                          | Forward      | GCCGGGCTTAGAGGATAGGTAC                     |
|                                | Reverse      | TTCCTCTTTGAGCTTGACCA                       |
| P6                             | Forward      | GGCTTCGATAGGAAGAATGCC                      |
|                                | Reverse      | GTGAAACTGCCAGATCCAAATTC                    |
| P9                             | Forward      | CCGTTTCTGGGTAGGTCGGC                       |
|                                | Reverse      | CCAATTCTTGACTGGAGTGGAC                     |
| AtSN1                          | Forward      | ACCAACGTGCTGTTGGCCCAGTGGTAAATC             |
|                                | Reverse      | AAAATAAGTGGTGGTTGTACAAGC                   |
| soloLTR                        | Forward      | ATAAACTCGAAACAAGAGTTTTCTTATTGCTTTC         |
|                                | Reverse      | TAATGGTATTATTTTGATCAGTGTATAAACCGGA         |
| <b>RT PCR Figure 2C and 5C</b> |              |                                            |
| IGN5A amplicon 1               | RT           | CGCAGCGGAATTGACATCCTATC                    |
|                                | PCR          | TCGGAAAGAGACTCTCCGCTAGAAA                  |
| IGN5A amplicon 2               | RT           | CGCAGCGGAATTGACATCCTATC                    |
|                                | PCR          | ACAAGGACCAACCATGTCCGC                      |
| IGN22                          | RT           | CGGGTCCTTGACTCCTGAT                        |
|                                | PCR          | TCGTGACCGGAATAATTAATGG                     |
| IGN23                          | RT           | ACTGAAAATTGTAAACAAAGAAACGGCACTACA          |
|                                | PCR          | GATCGGTCCATAAACTTGTGGGTTT                  |
| IGN24                          | RT           | CGCATACGATGGTCGGAGAGTT                     |
|                                | PCR          | GCTTATCATTATCCAACTTGATCCTATCCTAAA          |
| IGN25                          | RT           | CTTCTTATCGTGTTACATTGAGAACTCTTTCC           |
|                                | PCR          | ATTCGTGTGGGCTTGGCCTCTT                     |

|                             |               |                                                          |
|-----------------------------|---------------|----------------------------------------------------------|
| IGN26                       | RT            | CGGCCAGGAAACCCTAACTTCC                                   |
|                             | PCR           | CTCTTTCAGTGCACAGCCTCAT                                   |
| IGN29                       | RT            | CATGTGTTGTTGTGTGTTTCACTAT                                |
|                             | PCR           | TAAAACCTTTTCCCGCCAACCA                                   |
| IGN34                       | RT            | CCCTTTCATCGACACTGACA                                     |
|                             | PCR           | ATGAATAACAAATTTGGAGTCGTC                                 |
| IGN35                       | RT            | GACGGACCAAACGATTTTCAT                                    |
|                             | PCR           | TTCCTCTTTGAGCTTGACCA                                     |
| IGN36                       | RT            | CAGTTTTGGGTGCGGTTTAT                                     |
|                             | PCR           | GACAAAAATTGCTTTAGACCATGA                                 |
| AtSN1b                      | RT            | CCTTTCCAAGACACCATCTCAACAAC                               |
|                             | PCR           | TCCTCAACAAAAATAATTCCGAACGAC                              |
| TUB8                        | RT            | TCGAATCGATCCCGTGCT                                       |
|                             | PCR           | TCACATACAAGGTGGCCAATG                                    |
| <b>qRT PCR Figure 5A</b>    |               |                                                          |
| IGN5A                       | GSP RT primer | CGCAGCGGAATTGACATCCTATC                                  |
|                             | PCR P1        | TACATGAAGAAAGCCCAAACC                                    |
|                             | PCR P2        | ATTGGGCCGAATAACAGC                                       |
| IGN22                       | GSP RT primer | CGGGTCCTTGGACTCCTGAT                                     |
|                             | PCR P1        | GCCCCACAAATGGAAGAGGTCT                                   |
|                             | PCR P2        | TCGTGACCGGAATAATTAATGG                                   |
| IGN29                       | GSP RT primer | CATGTGTTGTTGTGTGTTTCACTAT                                |
|                             | PCR P1        | CGTTTGTTTATGTAGGGCGAAAG                                  |
|                             | PCR P2        | TAAAACCTTTTCCCGCCAACCA                                   |
| ACT2                        | GSP RT primer | AAGAATGGAACCACCGATCCAGACA                                |
|                             | PCR P1        | GCTGACCGTATGAGCAAAGA                                     |
|                             | PCR P2        | CTGTACTTCCTTTCAGGTGGT                                    |
| <b>RT PCR Figure S1B</b>    |               |                                                          |
| AtSN1                       | P1            | ACC AAC GTG CTG TTG GCC CAG TGG TAA ATC                  |
|                             | P2            | AAA ATA AGT GGT GGT TGT ACA AGC                          |
| Actin                       | P1            | TCA TAC TAG TCT CGA GAG ATG ACT CAG ATC ATG<br>TTT GAG   |
|                             | P2            | TCA TTC TAG AGG CGC GCC ACA ATT TCC CGT TCT<br>GCG GTA G |
| GAPA                        | P1            | GGT AGG ATC GGG AGG AAC                                  |
|                             | P2            | GAT AAC CTT CTT GGC ACC AG                               |
| <b>sRNA blot Figure S1C</b> |               |                                                          |
| miR171                      |               | TGATTGAGCCGCGCCAATATCctgtctc                             |
| miR163                      |               | TTGAAGAGGACTTGGAACTTCGATcctgtctc                         |



|                                                     |               |                                         |
|-----------------------------------------------------|---------------|-----------------------------------------|
| 45S                                                 |               | CAATGTCTGTTGGTGCCAAGAGGGAAAAGGGCctgtctc |
| AtCopia                                             |               | TTATTGGAACCCGGTTAGGAcctgtctc            |
|                                                     |               |                                         |
| <b>In vitro transcription templates Figure 2D</b>   |               |                                         |
| CTAATTCGCAACGAAAGCTTCGATCTGACTGTGTACGCCTGGTCCGACTCG |               |                                         |
| UGCAUAAAGACCAGGC                                    |               |                                         |
|                                                     |               |                                         |
| <b>Cloning for heterologous expression</b>          |               |                                         |
| RRP6L1 full cDNA                                    | Forward       | CACCATGAGATTTGATGATCCCATGGATGAGTTC      |
|                                                     | Reverse       | AATGTTAAGAAAGCCACGTTTCATATTCATG         |
| NRPE1 aa 1851-1976                                  | Forward       | CAC CAT GCC TCG GCC TAG CGG AAA CAG     |
|                                                     | Reverse       | TTA TGT CTG CGT CTG GGA CGG             |
|                                                     |               |                                         |
| <b>3' RACE</b>                                      |               |                                         |
| IGN5 top                                            | GSP1 external | TGTTGGTTATTGGGCCGCATGATACA              |
|                                                     | GSP2 internal | AGCATTGTCTACTCTTCTCGGGAAC               |
| IGN5 bottom                                         | GSP1 external | TGAAGAAAGCCCAAACCATACT                  |
|                                                     | GSP2 internal | GCTGTTATTCGGCCAATAGCC                   |
| IGN17                                               | GSP1 external | AACCCTAGCCTTTCATTAACCCCTCTC             |
|                                                     | GSP2 internal | CCCTCTCTGAATTCATCTCTAGTATTT             |
| IGN23                                               | GSP1 external | ACTGAAAATTGTAAACAAAGAAACGGCACTACA       |
|                                                     | GSP2 internal | GCCATTAGTTTTAGATGGACTGCAA               |
| IGN25                                               | GSP1 external | CTGGCATTCTTATTTGCAAGG                   |
|                                                     | GSP2 internal | CTTCTTATCGTGTTACATTGAGAACTCTTTCC        |
| IGN29                                               | GSP1 external | CGTTTGTTTATGTAGGGCGAAAG                 |
|                                                     | GSP2 internal | TGGTTGGCGGGAAAAGTTTTA                   |
| IGN35                                               | GSP1 external | TGGTCAAGCTCAAAGAGGAA                    |
|                                                     | GSP2 internal | CAAGCGGAAATTAACGGTCAAATAAC              |
| 3'RACE RT primer                                    |               | GGCCACGCGTCGACTAGTACTTTTTTTTTTTTTTTTTT  |
| 3'RACE PCR primer 1                                 |               | CUACUACUACUAGGCCACGCGTCGACTAGTAC        |
| 3'RACE PCR primer 2                                 |               | GGCCACGCGTCGACTAGTAC                    |

## Supplemental References

- Akalin, A., Kormaksson, M., Li, S., Garrett-Bakelman, F.E., Figueroa, M.E., Melnick, A., and Mason, C.E. (2012). methylKit: a comprehensive R package for the analysis of genome-wide DNA methylation profiles. *Genome Biol* *13*, R87.
- Campbell, B.R., Song, Y., Posch, T.E., Cullis, C.A., and Town, C.D. (1992). Sequence and organization of 5S ribosomal RNA-encoding genes of *Arabidopsis thaliana*. *Gene* *112*, 225-228.
- Johnson, N.R., Yeoh, J.M., Coruh, C., and Axtell, M.J. (2016). Improved Placement of Multi-mapping Small RNAs. *G3 (Bethesda)* *6*, 2103-2111.
- Krueger, F., and Andrews, S.R. (2011). Bismark: a flexible aligner and methylation caller for Bisulfite-Seq applications. *Bioinformatics* *27*, 1571-1572.
- Langmead, B., and Salzberg, S.L. (2012). Fast gapped-read alignment with Bowtie 2. *Nat Methods* *9*, 357-359.
- Li, H., Handsaker, B., Wysoker, A., Fennell, T., Ruan, J., Homer, N., Marth, G., Abecasis, G., Durbin, R., and Genome Project Data Processing, S. (2009). The Sequence Alignment/Map format and SAMtools. *Bioinformatics* *25*, 2078-2079.
- Martin, M. (2011). Cutadapt removes adapter sequences from high-throughput sequencing reads. *EMBnet.journal* *17*, 10-12.
- Pontes, O., Li, C.F., Costa Nunes, P., Haag, J., Ream, T., Vitins, A., Jacobsen, S.E., and Pikaard, C.S. (2006). The *Arabidopsis* chromatin-modifying nuclear siRNA pathway involves a nucleolar RNA processing center. *Cell* *126*, 79-92.
- Quinlan, A.R., and Hall, I.M. (2010). BEDTools: a flexible suite of utilities for comparing genomic features. *Bioinformatics* *26*, 841-842.
- Wendte, J.M., and Pikaard, C.S. (2017). The RNAs of RNA-directed DNA methylation. *Biochim Biophys Acta* *1860*, 140-148.
- Wierzbicki, A.T., Haag, J.R., and Pikaard, C.S. (2008). Noncoding transcription by RNA polymerase Pol IVb/Pol V mediates transcriptional silencing of overlapping and adjacent genes. *Cell* *135*, 635-648.
